# Supplementary material for: Shape-, size-, and density-tunable synthesis and optical properties of copper nanoparticles
Source: Royal Society of Chemistry journal article supplement (doi:10.1039/c7ce00750g), 2017-01-01
Supplement: c7ce00750g1.pdf [file c7ce00750g1.pdf]

## Supplementary Information

### Shape-, Size-, and Density-tunable Synthesis and Optical Property of Copper Nanoparticles

Chenhuinan Wei<sup>a</sup>, Qiming Liu<sup>\*ab</sup>

<sup>a</sup> Key Laboratory of Artificial Micro- and Nano-structures of Ministry of Education,  
School of Physics and Technology, Wuhan University, Wuhan 430072, China

<sup>b</sup> Shenzhen Research Institute, Wuhan University, Shenzhen 518057, China

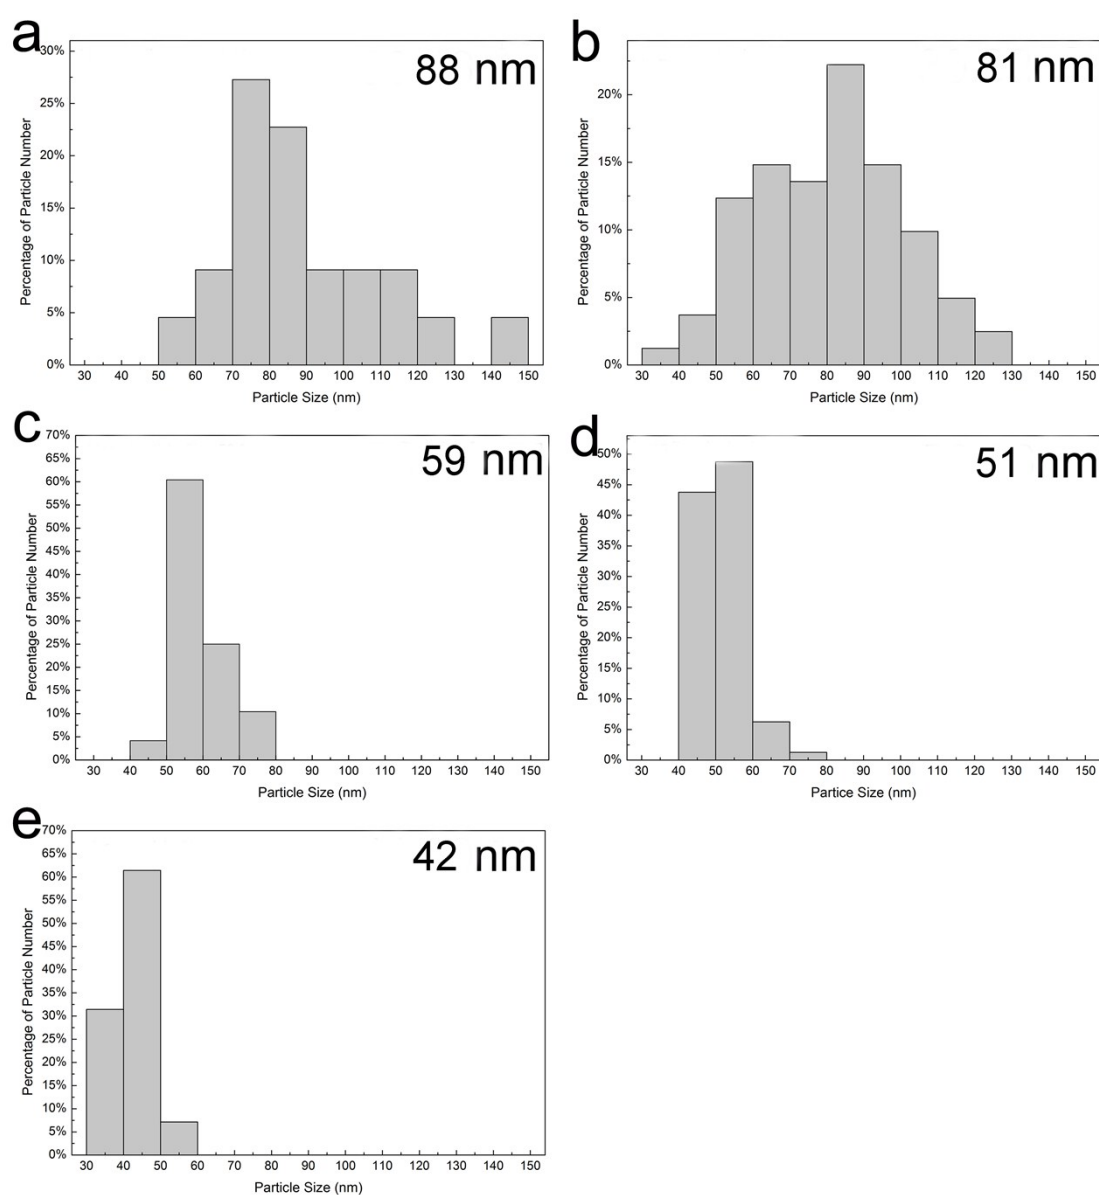

**Figure S1.** Size distribution of CuNPs synthesized from a 2 mM CuSO<sub>4</sub>-based electrolyte with 10 mM Na<sub>3</sub>CA for 1000 s at (a) -0.26 V, (b) -0.29 V, (c) -0.32 V, (d) -0.35 V, (e) -0.38 V vs. Ag|AgCl.

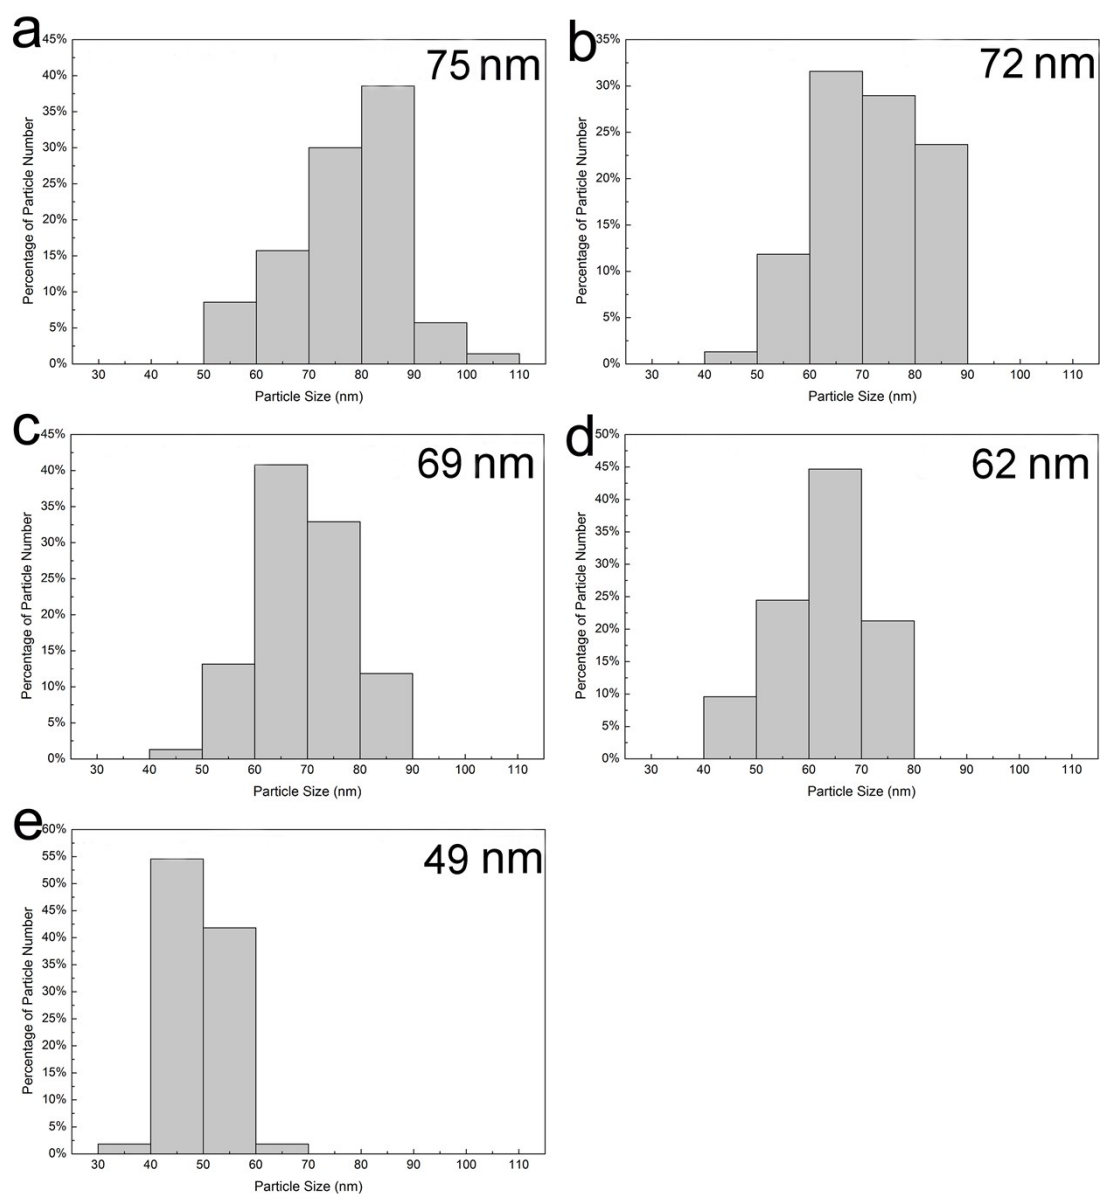

**Figure S2.** Size distribution of CuNPs synthesized from a 2 mM CuSO<sub>4</sub>-based electrolyte with 5 mM Na<sub>3</sub>CA for 1000 s at (a) -0.23 V, (b) -0.26 V, (c) -0.29 V, (d) -0.32 V, (e) -0.35 V vs. Ag|AgCl.

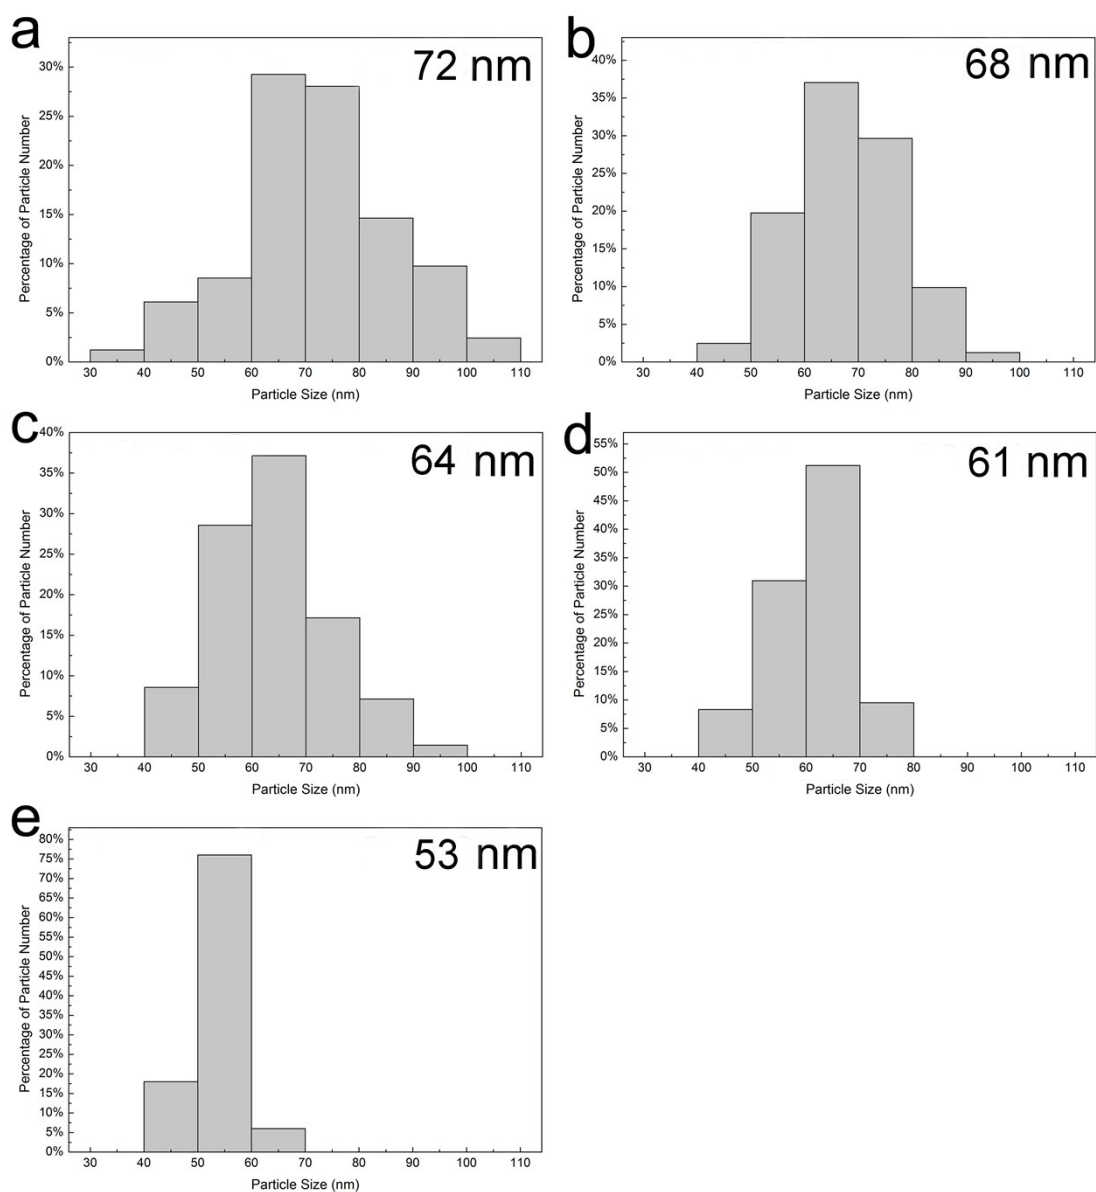

**Figure S3.** Size distribution of CuNPs synthesized from a 5 mM  $\text{CuSO}_4$ -based electrolyte with 10 mM  $\text{Na}_3\text{CA}$  for 1000 s at (a) -0.20 V, (b) -0.23 V, (c) -0.26 V, (d) -0.29 V, (e) -0.32 V vs.  $\text{Ag}|\text{AgCl}$ .

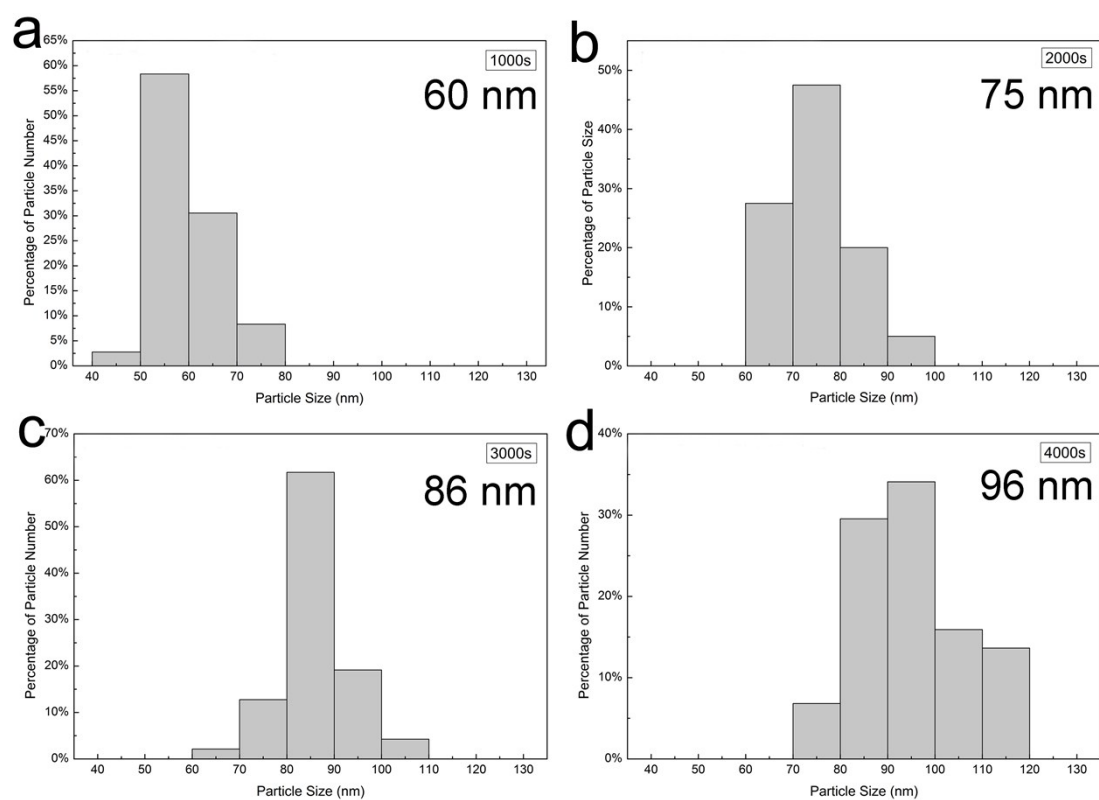

**Figure S4.** Size distribution of CuNPs synthesized from a 2 mM  $\text{CuSO}_4$ -based electrolyte with 10 mM  $\text{Na}_3\text{CA}$  at -0.32 V vs.  $\text{Ag}|\text{AgCl}$  for (a) 1000 s, (b) 2000 s, (c) 3000 s, (4) 4000 s.
